# Supplementary material for: Usability and feasibility assessment of a smartphone application (Suhriday) for heart failure self-care remote monitoring in an Indian tertiary health care setting: a pilot mixed-methods study
Source: HighWire-hosted journal article supplement (doi:10.1136/bmjopen-2021-056962), 2022-08-01
Supplement: bmjopen-2021-056962supp002_data_supplement.pdf [file bmjopen-2021-056962supp002_data_supplement.pdf]

## Appendix 2: App design and features

### App at nurse interface:

#### 1. Log in page

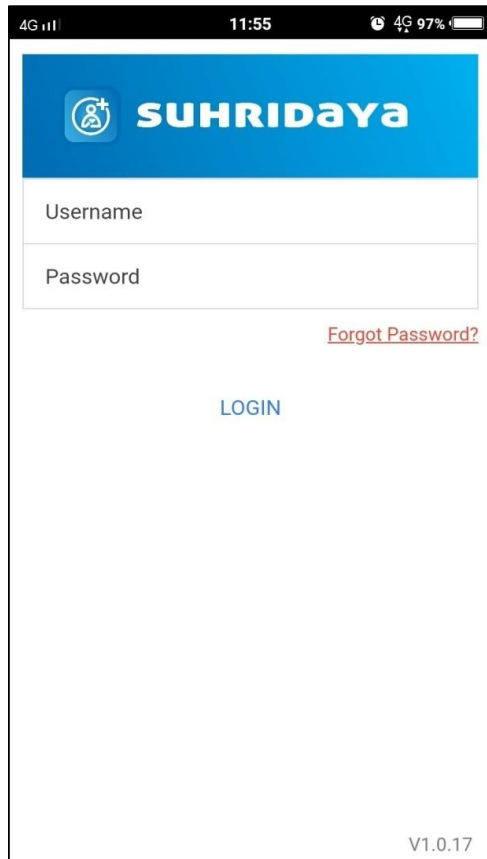

#### 2. Menu

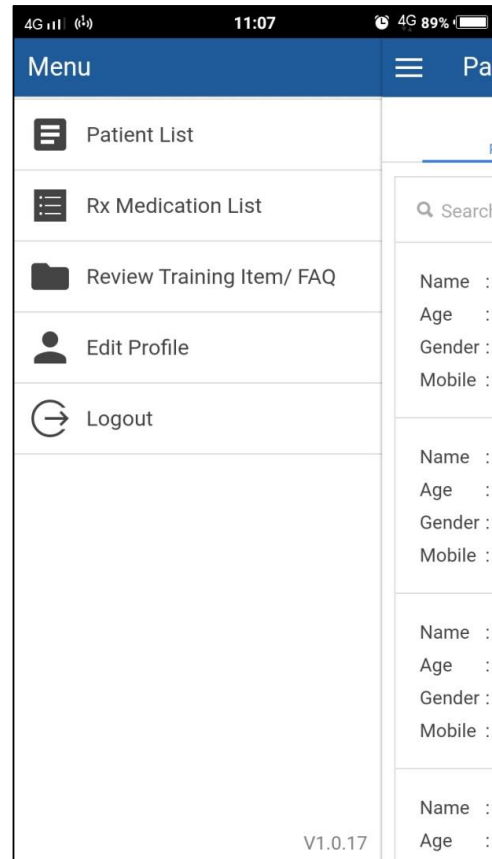

## mHealth \_ Appendix 2

**3. Add new patient**

4G 11:13 4G 86%

☰ Add New Patient

DEMOGRAPHICS

Hospital/IP Number\* Enter Hospital/IP Number

Trial Unique Id\* Enter Trial Unique Id

First Name\* Enter First Name ↑ 📞

Last Name Enter Last Name

Date of Birth\* 11/22/2020

Gender\* ▾

Height  cm ▾

Mobile Number\* Enter Mobile Number

Email Enter Email

Contact Details

Address Line 1 Enter Address

**4. Patient detailed profile**

4G 11:14 4G 85%

☰ Edit Patient

Demographics Medical Records Co-morbidities Symptoms Key Investigations

DEMOGRAPHICS

Hospital/IP Number\* Enter Hospital/IP Number

Trial Unique Id\* Enter Trial Unique Id

First Name\* Enter First Name

Last Name Enter Last Name

Date of Birth\*

Gender\* Male ▾

Height  cm ▾

Mobile Number\* Enter Mobile Number

Email Enter Email

## mHealth \_ Appendix 2

**5. Patient medical records**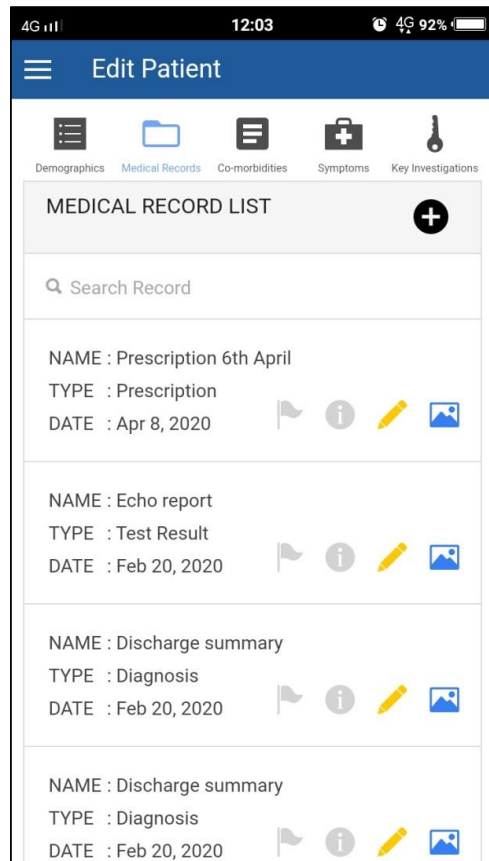**6. To create medication list**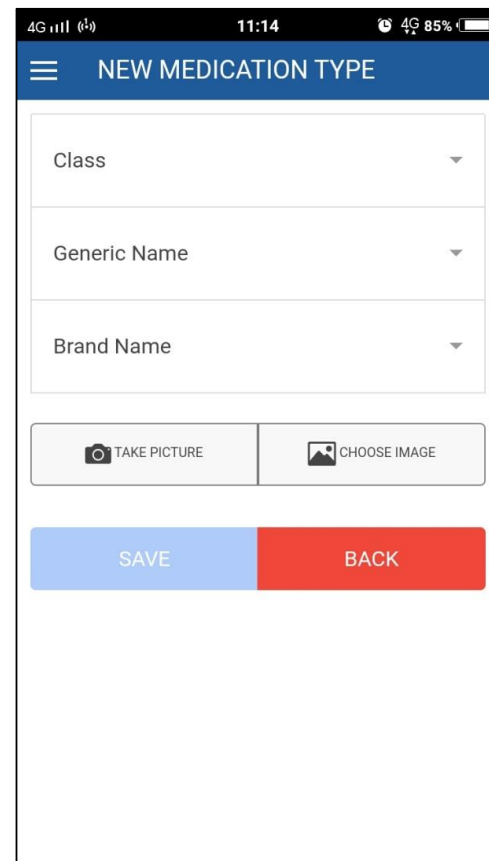

mHealth \_ Appendix 2

7. Assigning task

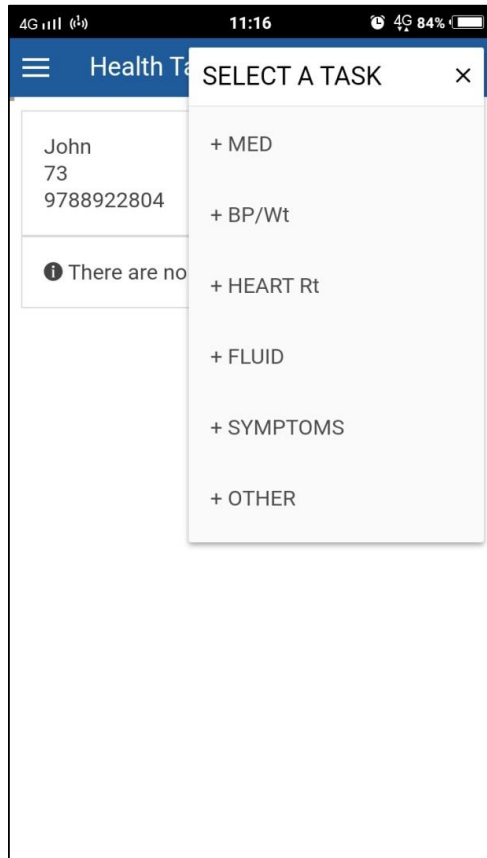

8. Assign medication reminder after filling medication details

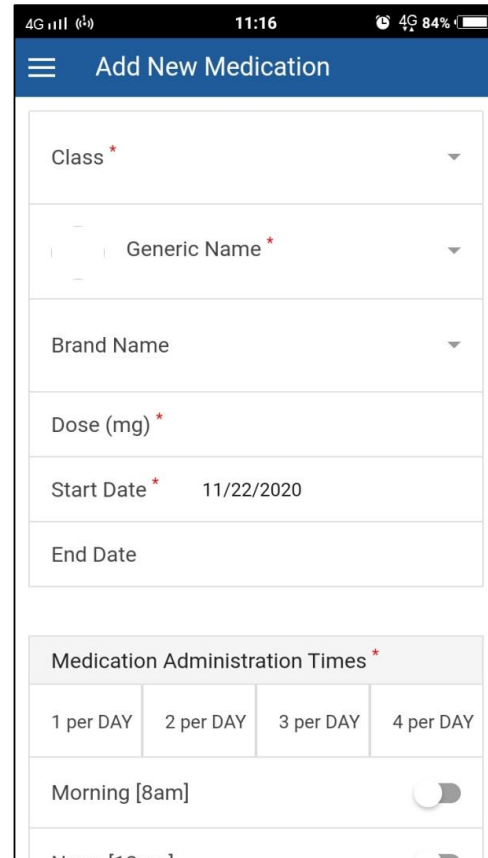

## mHealth \_ Appendix 2

**9. Assign BP/weight task**

4G 11:17 4G 84%

☰ Add BP/Weight

ADD BP EVENT

End Date

SYSTOLIC ALERT RANGE WITH SYMPTOMS

DEFAULT RANGE - (mmHg)

Min

Max

SYSTOLIC ALERT RANGE WITHOUT SYMPTOMS

DEFAULT RANGE - (mmHg)

Min

Max

DIASTOLIC ALERT RANGE WITHOUT SYMPTOMS

**10. Assign fluid intake task**

4G 11:17 4G 84%

☰ Add Fluid Intake

End Date

Save Back

mHealth \_ Appendix 2

11. Assign heart rate task

12. Assign symptom/sign monitoring task

## mHealth \_ Appendix 2

**13. Recognizing alerts, Diastolic blood pressure**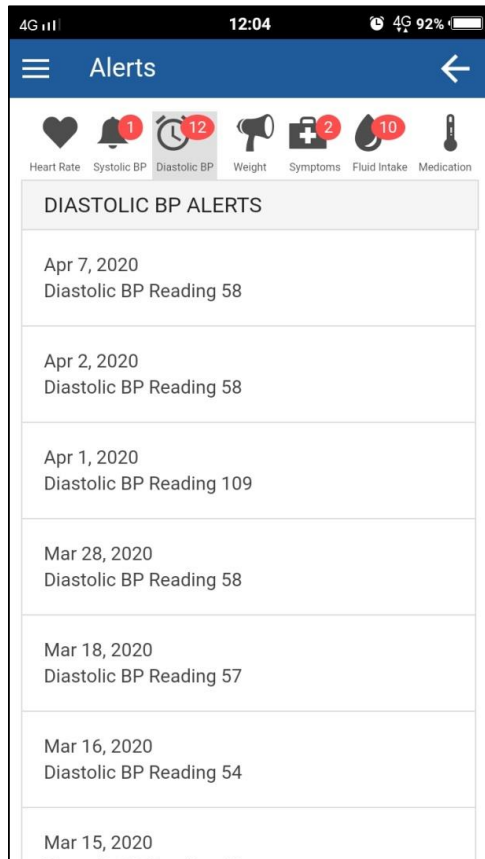**14. Recognizing fluid intake alerts**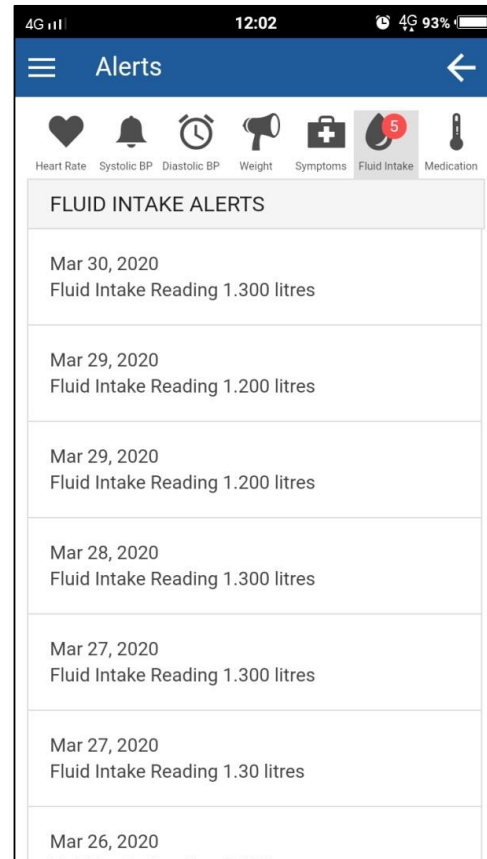

## mHealth \_ Appendix 2

**15. Recognizing symptom/sign alert**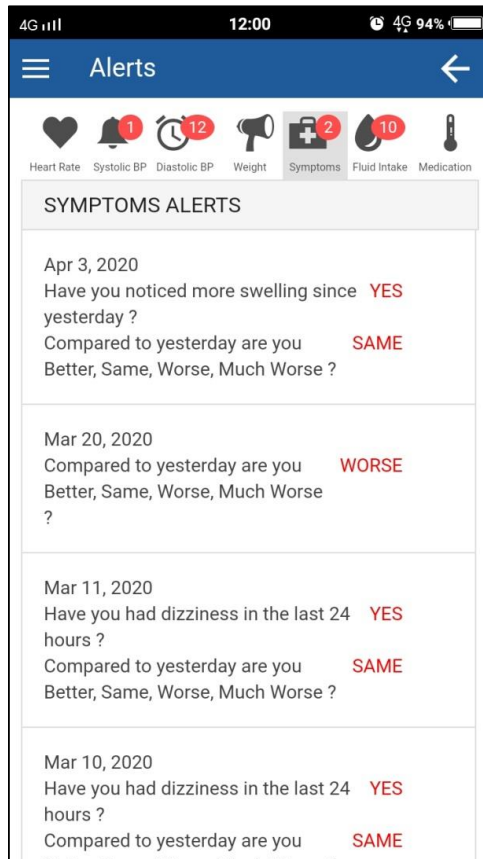**Table 1: Alerts reported by patients/ caregivers:**

| Alerts reported, N = 62  | No. of alerts n (%) |
|--------------------------|---------------------|
| Fluid intake             | 36 (58.1)           |
| Variance in diastolic BP | 12 (19.4)           |
| Symptom worsening        | 10 (16.1)           |
| Variance in systolic BP  | 4 (6.5)             |



mHealth \_ Appendix 2

**App at patient interface:**

**1. Menu**

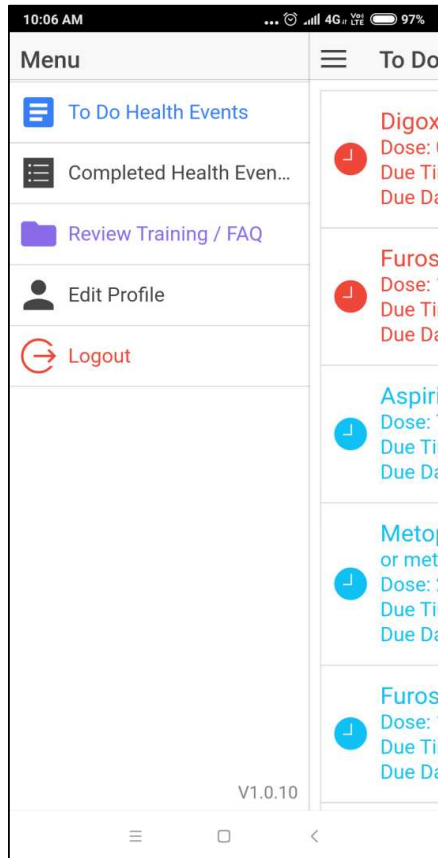

**2. To do health events**

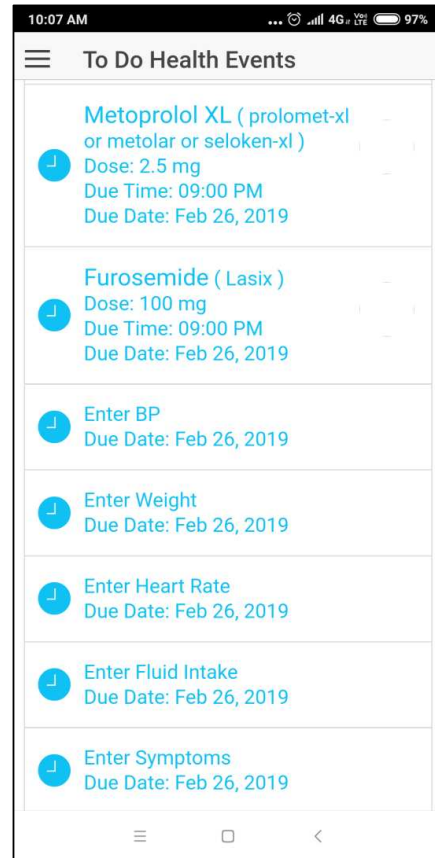

mHealth \_ Appendix 2

3. Medication taking & acknowledgement

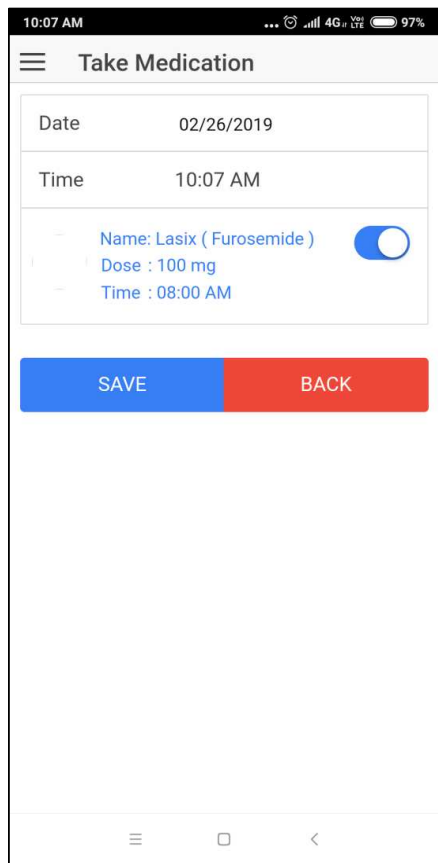

4. Completing task of entering

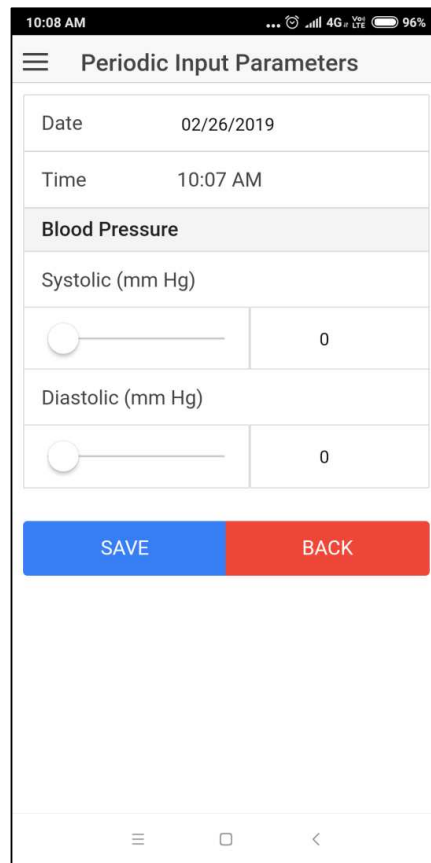

## mHealth \_ Appendix 2

**5. Completing task on entering weight**

10:08 AM 4G 96%

☰ Periodic Input Parameters

|                    |            |            |
|--------------------|------------|------------|
| Date               | 02/26/2019 |            |
| Time               | 10:08 AM   |            |
| <b>Weight</b>      |            |            |
| Enter Weight (Kgs) | 82         |            |
| BMI                | 29.05      | OVERWEIGHT |

SAVE BACK

☰ □ <

**6. Completing task on heart rate**

10:08 AM 4G 96%

☰ Heart Rate Record

|                         |            |
|-------------------------|------------|
| Date                    | 02/26/2019 |
| Time                    | 10:08 AM   |
| <b>Heart Rate (BPM)</b> |            |
| <input type="range"/>   | 207        |

SAVE BACK

☰ □ <

## mHealth \_ Appendix 2

**7. Completing task on entering fluid intake**

The screenshot shows the 'Fluid Intake Record' app interface. At the top, the status bar displays '10:08 AM', signal strength, 4G, Wi-Fi, and 96% battery. The app title 'Fluid Intake Record' is in the top left. Below the title, there are two input fields: 'Date' with the value '02/26/2019' and 'Time' with the value '10:08 AM'. A third field is labeled 'Fluid Intake (litres)' and contains a slider control and the number '4'. At the bottom, there are two buttons: a blue 'SAVE' button and a red 'BACK' button. The bottom navigation bar shows a hamburger menu icon, a square icon, and a back arrow icon.

**8. Reporting symptoms/signs task**

The screenshot shows the 'Symptoms Record' app interface. At the top, the status bar displays '10:09 AM', signal strength, 4G, Wi-Fi, and 96% battery. The app title 'Symptoms Record' is in the top left. Below the title, there are two input fields: 'Date' with the value '02/26/2019' and 'Time' with the value '10:08 AM'. The interface is divided into two sections: 'SYMPTOMS GP1' and 'SYMPTOMS GP2'. Under 'SYMPTOMS GP1', there are three questions, each with a blue toggle switch: 'Have you felt more short of breath since yesterday?', 'Have you noticed more swelling since yesterday?', and 'Have you had dizziness in the last day?'. Under 'SYMPTOMS GP2', there are two questions, each with a blue toggle switch: 'Did you wake up short of breath last night?' and 'Did you sleep on a chair propped up with a pillow last night?'. At the bottom, there is a text input field with the placeholder text 'Compared to yesterday are you Better, Worse, Much Worse?'. The bottom navigation bar shows a hamburger menu icon, a square icon, and a back arrow icon.

## mHealth \_ Appendix 2

**9. Completed health events**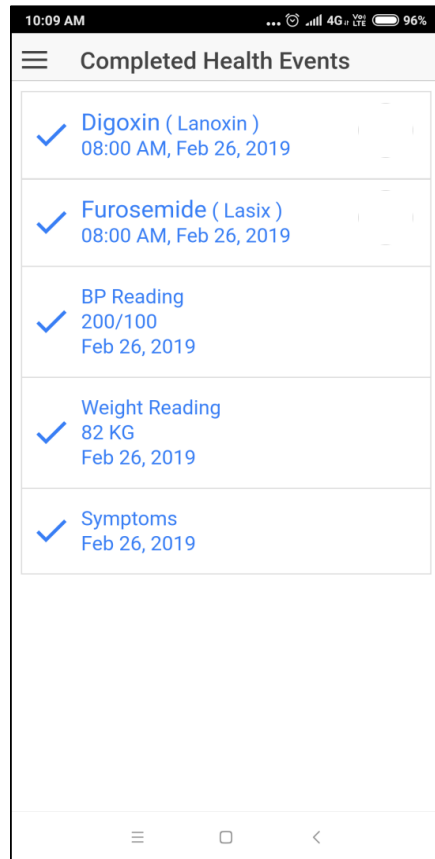**10. Viewing uploaded medical record**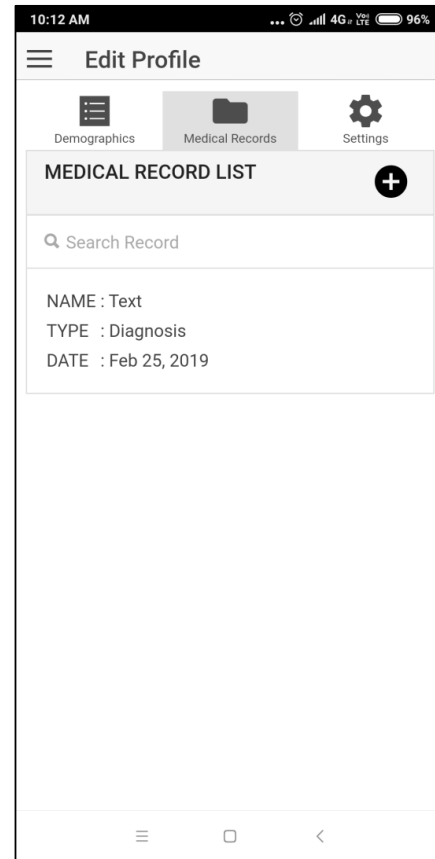**Table 2: App issues at patient/caregiver interface:**

| Technological issues at patient interface               | No. of issues |
|---------------------------------------------------------|---------------|
| App download issue                                      | 3             |
| Log in issue                                            | 1             |
| Medication swipe issue                                  | 1             |
| Translations missing (drug names and symptom questions) | 1             |
| Non-reflection of medication/ task lists                | 3             |
| <b>Total</b>                                            | <b>9</b>      |
